# Supplementary material
Source: HighWire-hosted journal article supplement (https://drc.bmj.com/content/10/6/e003149)
Supplement: inline-supplementary-material-6 [file inline-supplementary-material-6.xlsx]

## Sheet: diff_metabolite
Additional file 6 Differential metabolites between the MC and MET groups
Compound	Mean_MC	Mean_MET	VIP	p_value	Log2FC	Threshold
1-Monopalmitin	0.0685682	4.6385e-07	1.92419	0.00242902	17.1735	down
2-Deoxytetronic acid	0.00247196	0.000266711	2.09542	0.00249384	3.2123	down
Analyte 1233	0.00732212	4.6385e-07	1.33943	0.0321954	13.9463	down
Analyte 1238	0.0381222	0.00558031	1.76543	0.00504112	2.77221	down
Analyte 1546	0.629431	4.6385e-07	1.8356	6.12028e-06	20.372	down
Analyte 1588	0.0118812	0.00240669	1.41043	0.0489769	2.30355	down
Analyte 160	0.0089726	0.000700263	2.1924	0.0388899	3.67956	down
Analyte 1641	0.00469147	0.00103098	1.93333	0.00466347	2.18602	down
Analyte 1643	0.00706233	0.00134656	1.7244	0.0315117	2.39087	down
Analyte 1644	0.0141332	4.6385e-07	2.09925	0.033436	14.8951	down
Analyte 197	0.007222	4.6385e-07	2.06053	0.0326308	13.9265	down
Analyte 277	0.0110693	0.00228034	2.24886	0.0364088	2.27924	down
Analyte 533	0.00927856	0.000258238	2.22906	0.0161021	5.16713	down
Analyte 539	0.016352	4.6385e-07	2.20012	0.025039	15.1055	down
Analyte 8	3.30103	4.6385e-07	2.17144	0.0362145	22.7628	down
Fructose 2,6-biphosphate degr prod 2	0.161709	0.0229614	1.94926	0.0477874	2.81611	down
linoleic acid	0.307403	4.6385e-07	2.10699	0.0177809	19.338	down
Methyl jasmonate 4	0.00730933	0.00177081	2.1162	0.0256562	2.04533	down
N(epsilon)-Trimethyllysine	0.0308654	4.6385e-07	1.51398	0.0142135	16.022	down
oxamic acid	0.0472969	0.01005	2.02593	0.0464873	2.23455	down
Tagatose 1	0.00852465	4.6385e-07	1.99819	0.0472379	14.1657	down
xylose 1	0.223701	4.6385e-07	2.25037	0.0166087	18.8795	down
